CORRECTION

# Correction: SIgA Binding to Mucosal Surfaces Is Mediated by Mucin-Mucin Interactions

The PLOS ONE Staff

There are errors in [Fig 7](#) of the published article. Please see the correct [Fig 7](#) here.

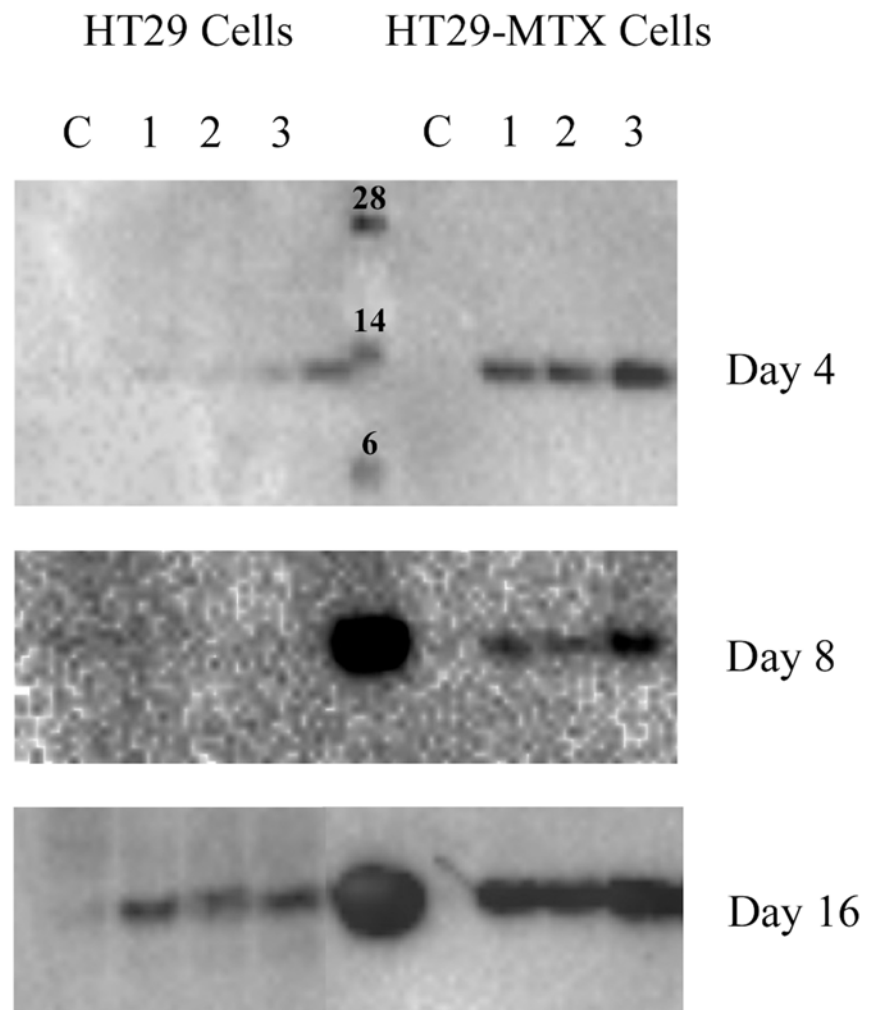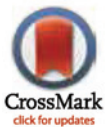

**OPEN ACCESS**

**Citation:** The PLOS ONE Staff (2015) Correction: SIgA Binding to Mucosal Surfaces Is Mediated by Mucin-Mucin Interactions. PLoS ONE 10(4): e0126887. doi:10.1371/journal.pone.0126887

**Published:** April 17, 2015

**Copyright:** © 2015 The PLOS ONE Staff. This is an open access article distributed under the terms of the [Creative Commons Attribution License](#), which permits unrestricted use, distribution, and reproduction in any medium, provided the original author and source are credited.

**Fig 7. Cystatin S western blot of cell homogenates.** Lanes 1–3 are cell homogenates where cells were incubated with saliva, C = control. The centre lane in Day 4 contains a molecular weight standard, whilst day 8 and 16 have WMS added.

doi:10.1371/journal.pone.0126887.g001

## Reference

1. Gibbins HL, Proctor GB, Yakubov GE, Wilson S, Carpenter GH (2015) SIgA Binding to Mucosal Surfaces Is Mediated by Mucin-Mucin Interactions. PLoS ONE 10(3): e0119677. doi: [10.1371/journal.pone.0119677](https://doi.org/10.1371/journal.pone.0119677) PMID: [25793390](https://pubmed.ncbi.nlm.nih.gov/25793390/)
